# Supplementary material
Source: Springer Nature journal article supplement (https://www.springermedizin.de/resource/supplementary/12936_2012_2130_MOESM1_ESM.pdf/9542772)
Supplement: MOESM1 [file 9542772]

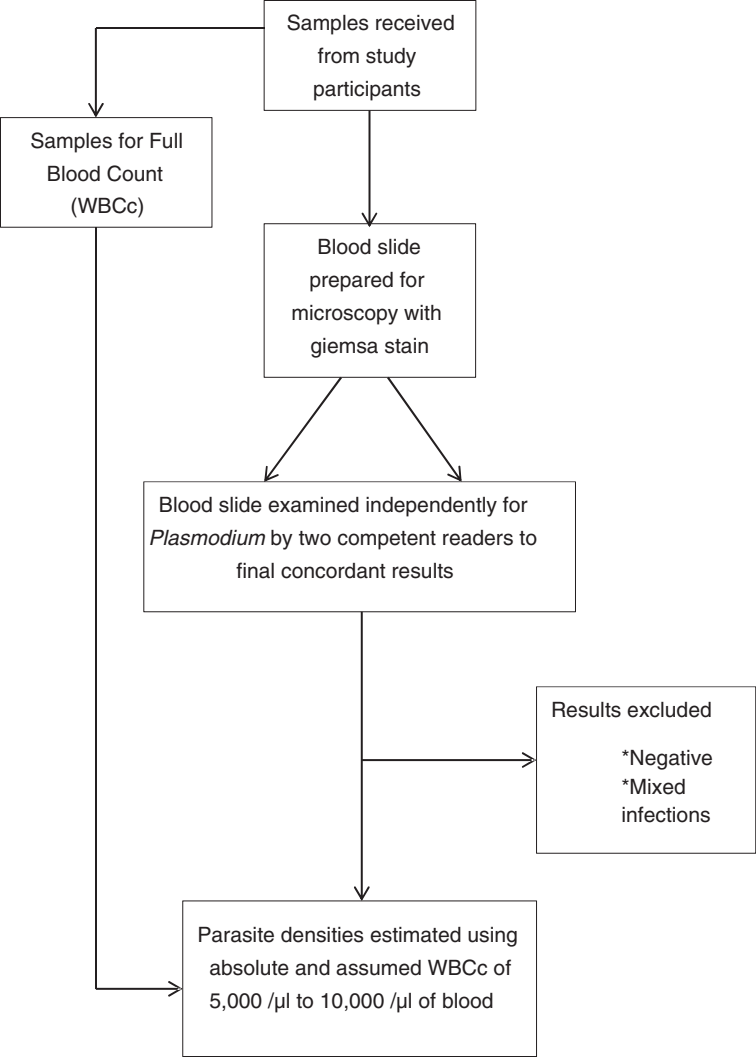

Samples received  
from study  
participants

Samples for Full  
Blood Count  
(WBCc)

Blood slide  
prepared for  
microscopy with  
giemsa stain

Blood slide examined independently for  
*Plasmodium* by two competent readers to  
final concordant results

Results excluded

\*Negative  
\*Mixed  
infections

Parasite densities estimated using  
absolute and assumed WBCc of  
5,000 /µl to 10,000 /µl of blood
